# Supplementary material for: Fine tuning the steric hindrance of the Eu(ii) tris(pyrazolyl)borate complex for a blue organic light-emitting diode
Source: Royal Society of Chemistry journal article supplement (doi:10.1039/d4tc01456a), 2024-01-01
Supplement: d4tc01456a1.pdf [file d4tc01456a1.pdf]

**Fine tuning the steric hindrance of Eu(II) tris(pyrazolyl)borate complex for blue organic light-emitting diode**

Wenchao Yan<sup>1,#</sup>, Yuqin Li<sup>2,#</sup>, Peihao Huo<sup>1,#</sup>, Ruoyao Guo<sup>1</sup>, Gang Yu<sup>1</sup>, Zifeng Zhao<sup>1</sup>,  
Kezhi Wang<sup>2</sup>, Zuqiang Bian<sup>1</sup>, and Zhiwei Liu<sup>1,\*</sup>

<sup>1</sup>Beijing National Laboratory for Molecular Sciences, State Key Laboratory of Rare Earth Materials Chemistry and Applications, College of Chemistry and Molecular Engineering, Peking University, Beijing 100871, China

<sup>2</sup>Beijing Key Laboratory of Energy Conversion and Storage Materials, College of Chemistry, Beijing Normal University, Beijing 100875, China

<sup>#</sup>These authors contribute equally to this work

\*Email: zwliu@pku.edu.cn

## Methods

**General Methods:**  $^1\text{H}$  NMR spectra were recorded on Bruker 400MHz NMR spectrometer. Electrospray ionization mass spectra (ESI-MS) were performed in negative ion mode on Bruker Apex IV Fourier transform ion cyclotron resonance mass spectrometer. Elemental analyses were conducted on a VARIO elemental analyzer from Elementar Analysensysteme GmbH.

**Photophysical Measurements:** Photophysical measurements were conducted in a nitrogen condition. Ultraviolet-visible absorption spectra were measured by Shimadzu UV-3600Plus UV-VIS-NIR spectrometer. Excitation and emission spectra were recorded on Edinburgh FLS980 fluorescence spectrophotometer. Luminescence decay lifetimes were obtained on a single photon counting spectrometer from Edinburgh FLS980 with laser as the excitation source. The data were analyzed by tail fit of the decay profile using a software package provided by Edinburgh Instruments. Absolute photoluminescence quantum yields were measured using Hamamatsu C9920-02 PL quantum yield measurement system with integrating sphere.

**Single Crystal Structure Measurements:** The single crystal X-ray diffraction (XRD) data were collected on Rigaku Mercury CCD diffractometer. The radiation used in the XRD analysis is the graphite-monochromated Mo  $K\alpha$  emission line ( $\lambda = 0.71069 \text{ \AA}$ ). XRD data were collected by using the CrystalClear software. Structural refinement was conducted with SHELXL-2014/7 software.

**Thermal Stability Measurement:** Thermal gravimetric analysis (TGA) was carried out on a Q600SDT instrument at an elevation temperature rate of  $10 \text{ }^\circ\text{C min}^{-1}$  under  $100 \text{ mL min}^{-1}$  nitrogen flow.

**Cyclic Voltammetry (CV) Measurement:** CV was carried out under inert atmosphere protection in dichloromethane solution with a CHI voltammetric analyzer. Tetrabutylammonium hexafluorophosphate ( $\text{TBAPF}_6$ ,  $0.1 \text{ M}$ ) was used as the supporting electrolyte. The conventional three-electrode configuration consists of a platinum working electrode, a platinum wire auxiliary electrode, and an Ag/AgCl wire pseudo-reference electrode with ferrocene as the external standard. Cyclic voltammogram was obtained at a scan rate of  $100 \text{ mV s}^{-1}$ .

**OLEDs Fabrication and Measurements:** Indium tin oxide (ITO) patterned anode was commercially available with a sheet resistance of  $14 \Omega \text{ square}^{-1}$  and a thickness of 80 nm. ITO substrates were cleaned with deionized water and ethanol. The organic and metal layers were deposited in different vacuum chambers with a base pressure better than  $1 \times 10^{-4}$  Pa. The active area for each device is  $4 \text{ mm}^2$ . All electric testing and optical measurements were performed under ambient conditions with encapsulation of devices in a glovebox. The electroluminescence spectra, current density-voltage-luminance, and EQE characteristics were measured by computer controlled Keithley 2400 source meter and absolute EQE measurement system (C9920-12) with photonic multichannel analyzer (PMA-12, Hamamatsu Photonics).

## Experimental Section

All chemical reagents used in the synthesis process were commercially available and were used as received unless otherwise mentioned. 3-ethyl-1*H*-pyrazole, 3-cyclohexyl-1*H*-pyrazole and 3-(adamantan-1-yl)-1*H*-pyrazole were synthesized according as reported methods<sup>1-3</sup>.

### Synthesis of ligands

Synthesis of KTp<sup>Et</sup>:  $\text{KBH}_4$  (0.85 g, 16 mmol) and 3-ethyl-1*H*-pyrazole (5.00 g, 52.0 mmol) were mixed in a 50 mL flask, and the mixture was heated slowly to  $190 \text{ }^\circ\text{C}$  under nitrogen atmosphere until 3 equiv. of  $\text{H}_2$  evolved. After cooling down, the resulting solid was loaded into a thermal sublimator. With a gradient temperature of  $260\text{-}120 \text{ }^\circ\text{C}$  and a pressure of  $\sim 8 \text{ Pa}$ , 3.78 g KTp<sup>Et</sup> was obtained as white powder. Yield: 71%.  $^1\text{H}$  NMR ( $\text{DMSO-}d_6$ ):  $\delta$  7.15-7.13 (3H, d), 5.78-5.76 (3H, d), 2.51-2.44 (6H, q), 1.15-1.09 (9H, t). ESI-MS negative: calcd. for  $\text{C}_{15}\text{H}_{22}\text{BN}_6^-$  297.20, found 297.20.

Synthesis of KTp<sup>iPr</sup>: Similarly to that of KTp<sup>Et</sup>, instead of  $\text{KBH}_4$  (0.39 g, 7.2 mmol) and 3-isopropyl-1*H*-pyrazole (2.78 g, 25.2 mmol) were used. With a gradient temperature of  $260\text{-}120 \text{ }^\circ\text{C}$  and a pressure of  $\sim 8 \text{ Pa}$ , 1.75 g KTp<sup>iPr</sup> was obtained as white powder. Yield: 64%.  $^1\text{H}$  NMR ( $\text{DMSO-}d_6$ ):  $\delta$  7.12-7.09 (3H, d), 5.80-5.77 (3H, d), 2.88-2.77 (3H, m), 1.17-1.03 (18H, d). ESI-MS negative: calcd. for  $\text{C}_{18}\text{H}_{28}\text{BN}_6^-$  339.25, found 339.25.

Synthesis of KTp<sup>Cy</sup>: KBH<sub>4</sub> (0.38 g, 7.0 mmol) and 3-cyclohexyl-1*H*-pyrazole (4.00 g, 26.6 mmol) were mixed in a 50 mL flask, and the mixture was heated slowly to 200 °C under nitrogen atmosphere until 3 equiv. of H<sub>2</sub> evolved. Then, toluene (15 mL) was added to avoid the aggregation of product. The resulting solid was filtered, washed with hexane, and dried under vacuum. 2.33 g KTp<sup>Cy</sup> was obtained as white powder. Yield: 66%. <sup>1</sup>H NMR (DMSO-*d*<sub>6</sub>): δ 7.11-7.05 (3H, d), 5.79-5.71 (3H, d), 2.54-2.42 (3H, m), 1.92-1.78 (6H, m), 1.77-1.59 (9H, m), 1.38-1.11 (15H, m). ESI-MS negative: calcd. for C<sub>27</sub>H<sub>40</sub>BN<sub>6</sub><sup>-</sup> 459.34, found 459.34.

Synthesis of KTp<sup>tBu</sup>: Similarly to that of KTp<sup>Et</sup>, instead of KBH<sub>4</sub> (0.29 g, 5.4 mmol) and 3-(*tert*-butyl)-1*H*-pyrazole (2.00 g, 16.1 mmol) were used. With a gradient temperature of 260-120 °C and a pressure of ~ 8 Pa, 1.58 g KTp<sup>tBu</sup> was obtained as white powder. Yield: 70%. <sup>1</sup>H NMR (DMSO-*d*<sub>6</sub>): δ 6.98-6.93 (3H, d), 5.84-5.77 (3H, d), 1.22-1.16 (27H, s). ESI-MS negative: calcd. for C<sub>21</sub>H<sub>34</sub>BN<sub>6</sub><sup>-</sup> 381.29, found 381.29.

Synthesis of KTp<sup>Ad</sup>: Similarly to that of KTp<sup>Cy</sup>, instead of KBH<sub>4</sub> (0.23 g, 4.3 mmol) and 3-(adamantan-1-yl)-1*H*-pyrazole (3.00 g, 14.8 mmol) were used. 1.87 g KTp<sup>Ad</sup> was obtained as white powder. Yield: 67%. <sup>1</sup>H NMR (DMSO-*d*<sub>6</sub>): δ 6.96-6.91 (3H, d), 5.80-5.75 (3H, d), 2.00-1.93 (9H, m), 1.87-1.81 (18H, m), 1.73-1.67 (18H, m). ESI-MS negative: calcd. for C<sub>39</sub>H<sub>52</sub>BN<sub>6</sub><sup>-</sup> 615.43, found 615.43.

### Synthesis of Eu(II) complexes

Synthesis of Eu-Et: EuI<sub>2</sub> (0.27 g, 0.67 mmol) and KTp<sup>Et</sup> (0.45 g, 1.3 mmol) were added to a 50 mL flask with 20 mL dry tetrahydrofuran in a glovebox. The mixture was stirred overnight at room temperature and then the solvent was removed under vacuum. The resulting solid was loaded into a thermal sublimator. With a gradient temperature of 170-100 °C and a pressure of ~ 10<sup>-4</sup> Pa, 0.25 g Eu-Et was obtained as orange-yellow powder. Yield: 50%. Anal. calcd for C<sub>30</sub>H<sub>44</sub>B<sub>2</sub>EuN<sub>12</sub>: C 48.28, H 5.94, N 22.52; found: C 48.34, H 5.89, N 22.34.

Synthesis of Eu-*i*Pr: Similarly to that of Eu-Et, instead of EuI<sub>2</sub> (0.11 g, 0.27 mmol) and KTp<sup>*i*Pr</sup> (0.20 g, 0.53 mmol) were used. With a gradient temperature of 170-120 °C and a pressure of ~ 10<sup>-4</sup> Pa, 0.13 g Eu-*i*Pr was obtained as yellow powder. Yield: 58%. Anal. calcd for C<sub>36</sub>H<sub>56</sub>B<sub>2</sub>EuN<sub>12</sub>: C 52.06, H 6.80, N 20.24; found: C 52.24, H 6.98, N

19.97.

Synthesis of Eu-Cy: EuI<sub>2</sub> (0.16 g, 0.39 mmol) and KTp<sup>Cy</sup> (0.40 g, 0.80 mmol) were added to a 50 mL flask with 20 mL dry tetrahydrofuran in a glovebox. The mixture was stirred overnight at room temperature. After removing insoluble substance, the solvent was removed under vacuum. The resulting solid was recrystallized from *n*-hexane, 0.21 g Eu-Cy was obtained as yellowish green powder. Yield: 50%. Anal. calcd for C<sub>54</sub>H<sub>80</sub>B<sub>2</sub>EuN<sub>12</sub>: C 60.57, H 7.53, N 15.70; found: C 60.60, H 7.61, N 15.72.

Synthesis of Eu-tBu: Similarly to that of Eu-Et, instead of EuI<sub>2</sub> (0.48 g, 1.2 mmol) and KTp<sup>tBu</sup> (1.00 g, 2.4 mmol) were used. With a gradient temperature of 180-120 °C and a pressure of ~ 10<sup>-4</sup> Pa, 0.58 g Eu-tBu was obtained as pale green powder. Yield: 54%. Anal. calcd for C<sub>42</sub>H<sub>68</sub>B<sub>2</sub>EuN<sub>12</sub>: C 55.15, H 7.49, N 18.38; found: C 55.20, H 7.44, N 18.44.

Synthesis of Eu-Ad: Similarly to that of Eu-Cy, instead of EuI<sub>2</sub> (0.31 g, 0.76 mmol) and KTp<sup>Ad</sup> (0.50 g, 0.76 mmol) were used. 0.40 g Eu-Ad was obtained as pale green powder after recrystallization from *n*-hexane and tetrahydrofuran. Yield: 50%. Anal. calcd for C<sub>47</sub>H<sub>68</sub>BEuIN<sub>6</sub>O<sub>2</sub>: C 54.34, H 6.60, N 8.09; found: C 54.12, H 6.37, N 8.02.

**Table S1** Crystallographic data for Eu(II) complexes.

| Compound                                                     | Eu-tBu                                                            | Eu-Ad                                                             |
|--------------------------------------------------------------|-------------------------------------------------------------------|-------------------------------------------------------------------|
| Formula                                                      | C <sub>42</sub> H <sub>68</sub> B <sub>2</sub> EuN <sub>12</sub>  | C <sub>47</sub> H <sub>68</sub> BEuIN <sub>6</sub> O <sub>2</sub> |
| Mw                                                           | 914.66                                                            | 1038.74                                                           |
| Crystal system                                               | monoclinic                                                        | monoclinic                                                        |
| Space group                                                  | <i>P</i> 2 <sub>1</sub> / <i>c</i>                                | <i>I</i> 2/ <i>a</i>                                              |
| <i>a</i> (Å)                                                 | 11.0607(2)                                                        | 27.6985(3)                                                        |
| <i>b</i> (Å)                                                 | 21.0152(4)                                                        | 15.4209(2)                                                        |
| <i>c</i> (Å)                                                 | 20.7561(3)                                                        | 21.5097(2)                                                        |
| $\alpha$ (°)                                                 | 90                                                                | 90                                                                |
| $\beta$ (°)                                                  | 99.181(2)                                                         | 95.0190(10)                                                       |
| $\gamma$ (°)                                                 | 90                                                                | 90                                                                |
| <i>V</i> (Å <sup>3</sup> )                                   | 4762.80(15)                                                       | 9152.33(18)                                                       |
| <i>Z</i>                                                     | 4                                                                 | 8                                                                 |
| <i>T</i> (K)                                                 | 180.00(10)                                                        | 180.00(10)                                                        |
| $\theta$ range (°)                                           | 2.2230-28.3260                                                    | 2.1400-29.1210                                                    |
| <i>d</i> <sub>calc</sub> (g·cm <sup>-3</sup> )               | 1.276                                                             | 1.508                                                             |
| F (000)                                                      | 1908                                                              | 4232                                                              |
| Crystal size (mm)                                            | 0.05×0.02×0.01                                                    | 0.3×0.2×0.15                                                      |
| Absorp. coeff. (mm <sup>-1</sup> )                           | 1.358                                                             | 2.089                                                             |
| Index range                                                  | -14 ≤ <i>h</i> ≤ 14<br>-28 ≤ <i>k</i> ≤ 28<br>-28 ≤ <i>l</i> ≤ 27 | -37 ≤ <i>h</i> ≤ 35<br>-21 ≤ <i>k</i> ≤ 20<br>-29 ≤ <i>l</i> ≤ 22 |
| Reflns collected                                             | 35214 (R <sub>int</sub> = 0.0293)                                 | 53504 (R <sub>int</sub> = 0.0228)                                 |
| Indep. reflns                                                | 12060                                                             | 11615                                                             |
| Refns obs. [ <i>I</i> > 2σ( <i>I</i> )]                      | 9671                                                              | 10486                                                             |
| data/restr/paras                                             | 12060/24/567                                                      | 11615/0/523                                                       |
| GOF                                                          | 1.036                                                             | 1.044                                                             |
| R <sub>1</sub> /wR <sub>2</sub> [ <i>I</i> > 2σ( <i>I</i> )] | 0.0318/0.0670                                                     | 0.0207/0.0519                                                     |
| R <sub>1</sub> /wR <sub>2</sub> (all data)                   | 0.0472/0.0714                                                     | 0.0244/0.0533                                                     |
| Largest diff. peak & hole (e/Å <sup>3</sup> )                | 1.026/-0.506                                                      | 1.278/-0.762                                                      |

**Table S2** The selected bond lengths of Eu-tBu, Eu-Ad and Eu-Et.

| Eu-tBu | Bond length/Å | Eu-Ad | Bond length/Å | Eu-Et | Bond length/Å |
|--------|---------------|-------|---------------|-------|---------------|
| Eu-N1  | 2.595         | Eu-N1 | 2.581         | Eu-N1 | 2.598         |
| Eu-N2  | 2.644         | Eu-N2 | 2.648         | Eu-N2 | 2.576         |
| Eu-N3  | 2.623         | Eu-N3 | 2.633         | Eu-N3 | 2.617         |
| Eu-N4  | 2.650         | Eu-I  | 3.207         | Eu-N4 | 2.585         |
| Eu-N5  | 2.697         | Eu-O1 | 2.648         | Eu-N5 | 2.589         |
| -      | -             | Eu-O2 | 2.651         | Eu-N6 | 2.612         |

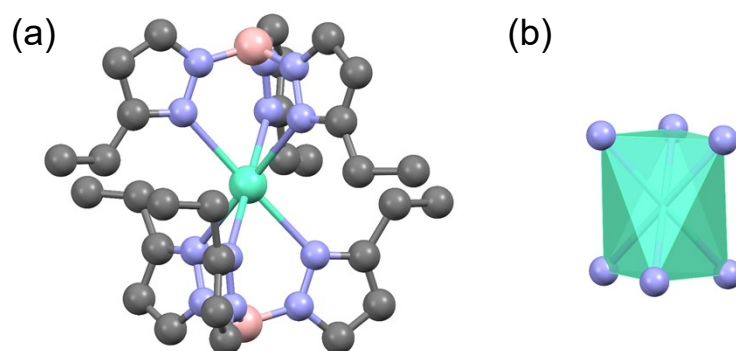

**Fig. S1** (a) The coordination model, and (b) coordination polyhedron of Eu-Et.

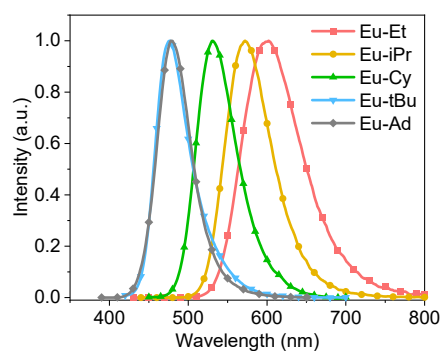

**Fig. S2** The emission spectra of Eu(II) complexes in solid powder under the excitation of 280 nm.

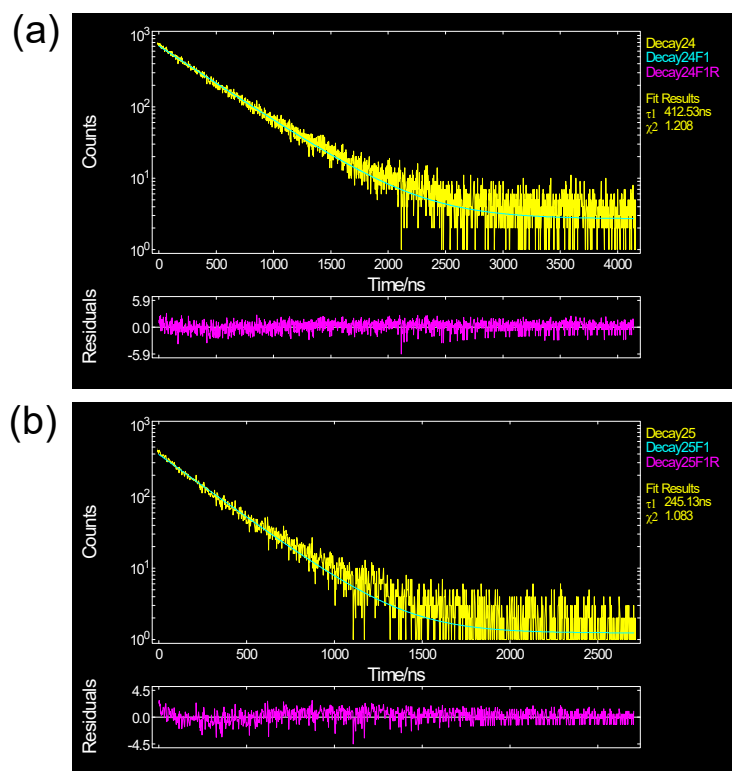

**Fig. S3** The lifetime fitting curves of Eu-Et and Eu-iPr on FLS980.

**Table S1** The original PLQY values of Eu(II) complexes during the two measurements.

| Complex | Solid |       | Solution |       |
|---------|-------|-------|----------|-------|
| Eu-Et   | 31.9% | 32.2% | 4.98%    | 4.93% |
| Eu-iPr  | 16.9% | 17.0% | 10.3%    | 10.3% |
| Eu-Cy   | 82.8% | 83.0% | 1.63%    | 1.65% |
| Eu-tBu  | 95.5% | 95.4% | 89.2%    | 89.1% |
| Eu-Ad   | 98.1% | 97.7% | 58.0%    | 57.9% |



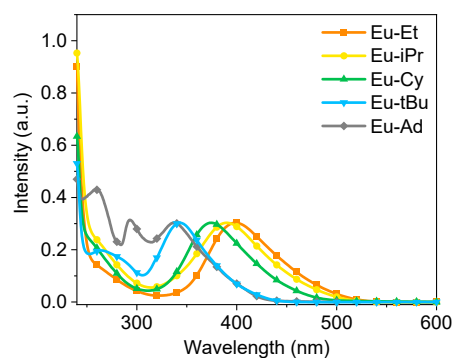

**Fig. S4** Absorption spectra of Eu(II) complexes in dichloromethane solutions ( $10^{-3}$  M).

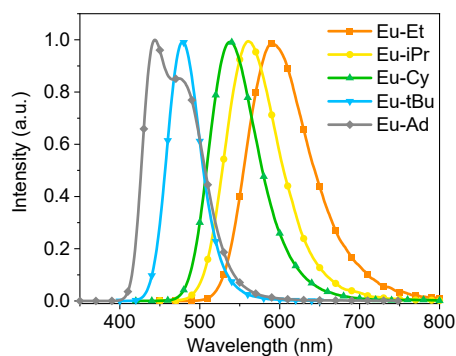

**Fig. S5** Emission spectra of Eu(II) complexes in dichloromethane solutions ( $10^{-3}$  M).

The excitation wavelengths for Eu-Et, Eu-iPr, Eu-Cy, Eu-tBu and Eu-Ad are 400, 400, 400, 360 and 340 nm, respectively.

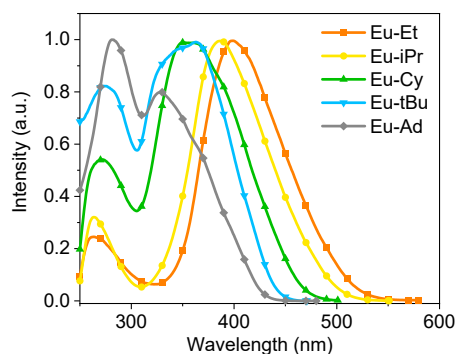

**Fig. S6** Excitation spectra of Eu(II) complexes in dichloromethane solutions ( $10^{-3}$  M).

The detecting wavelengths for Eu-Et, Eu-iPr, Eu-Cy, Eu-tBu and Eu-Ad are 590, 560, 570, 480 and 480 nm, respectively.

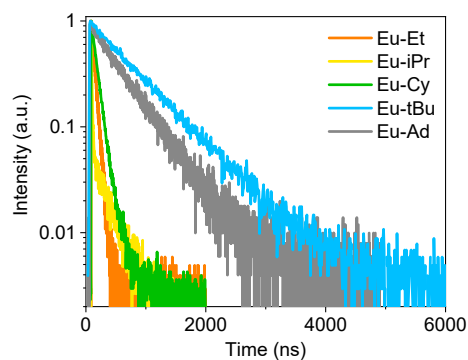

**Fig. S7** Decay spectra of Eu(II) complexes in dichloromethane solutions ( $10^{-3}$  M). The excitation wavelength is 405 nm, and the detecting wavelengths for Eu-Et, Eu-iPr, Eu-Cy, Eu-tBu and Eu-Ad are 590, 560, 530, 480 and 470 nm, respectively.

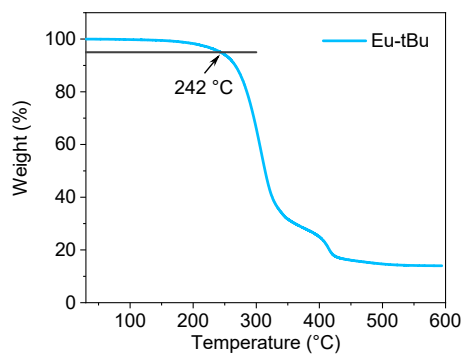

**Fig. S8** Thermogravimetric analysis of Eu-tBu.

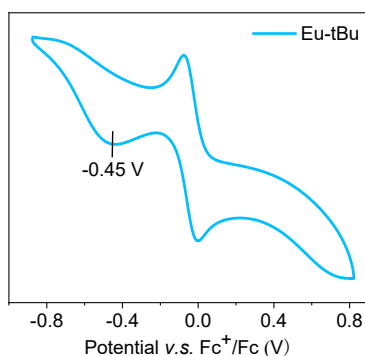

**Fig. S9** Cyclic voltammetry curve of Eu-tBu recorder in dichloromethane with ferrocene as an internal standard.

1. B. M. Ahmed and G. Mezei, Green protection of pyrazole, thermal isomerization and deprotection of tetrahydropyranylpurazoles, and high-yield, one-pot synthesis of 3(5)-alkylpurazoles, *RSC Adv.*, 2015, **5**, 24081-24093.
2. S. Trofimenko, A. L. Rheingold and L. M. L. Sands, Coordination chemistry of novel scorpionate ligands based on 3-cyclohexylpurazole and 3-cyclohexyl-4-bromopurazole, *Inorg. Chem.*, 2002, **41**, 1889-1896.
3. U. Gellrich, F. Wech, T. Müller and J. Becker, Synthesis of 6-adamantyl-2-pyridone and reversible hydrogen activation by the corresponding bis(perfluorophenyl)borane complex, *Synthesis*, 2020, **53**, 666-672.
